# Supplementary material for: Prognostic nomogram for bladder cancer with brain metastases: a National Cancer Database analysis
Source: Springer Nature journal article supplement (doi:10.1186/s12967-019-2109-7), 2019-12-01

### A Training Cohort: Global Schoenfeld Test p: 0.91

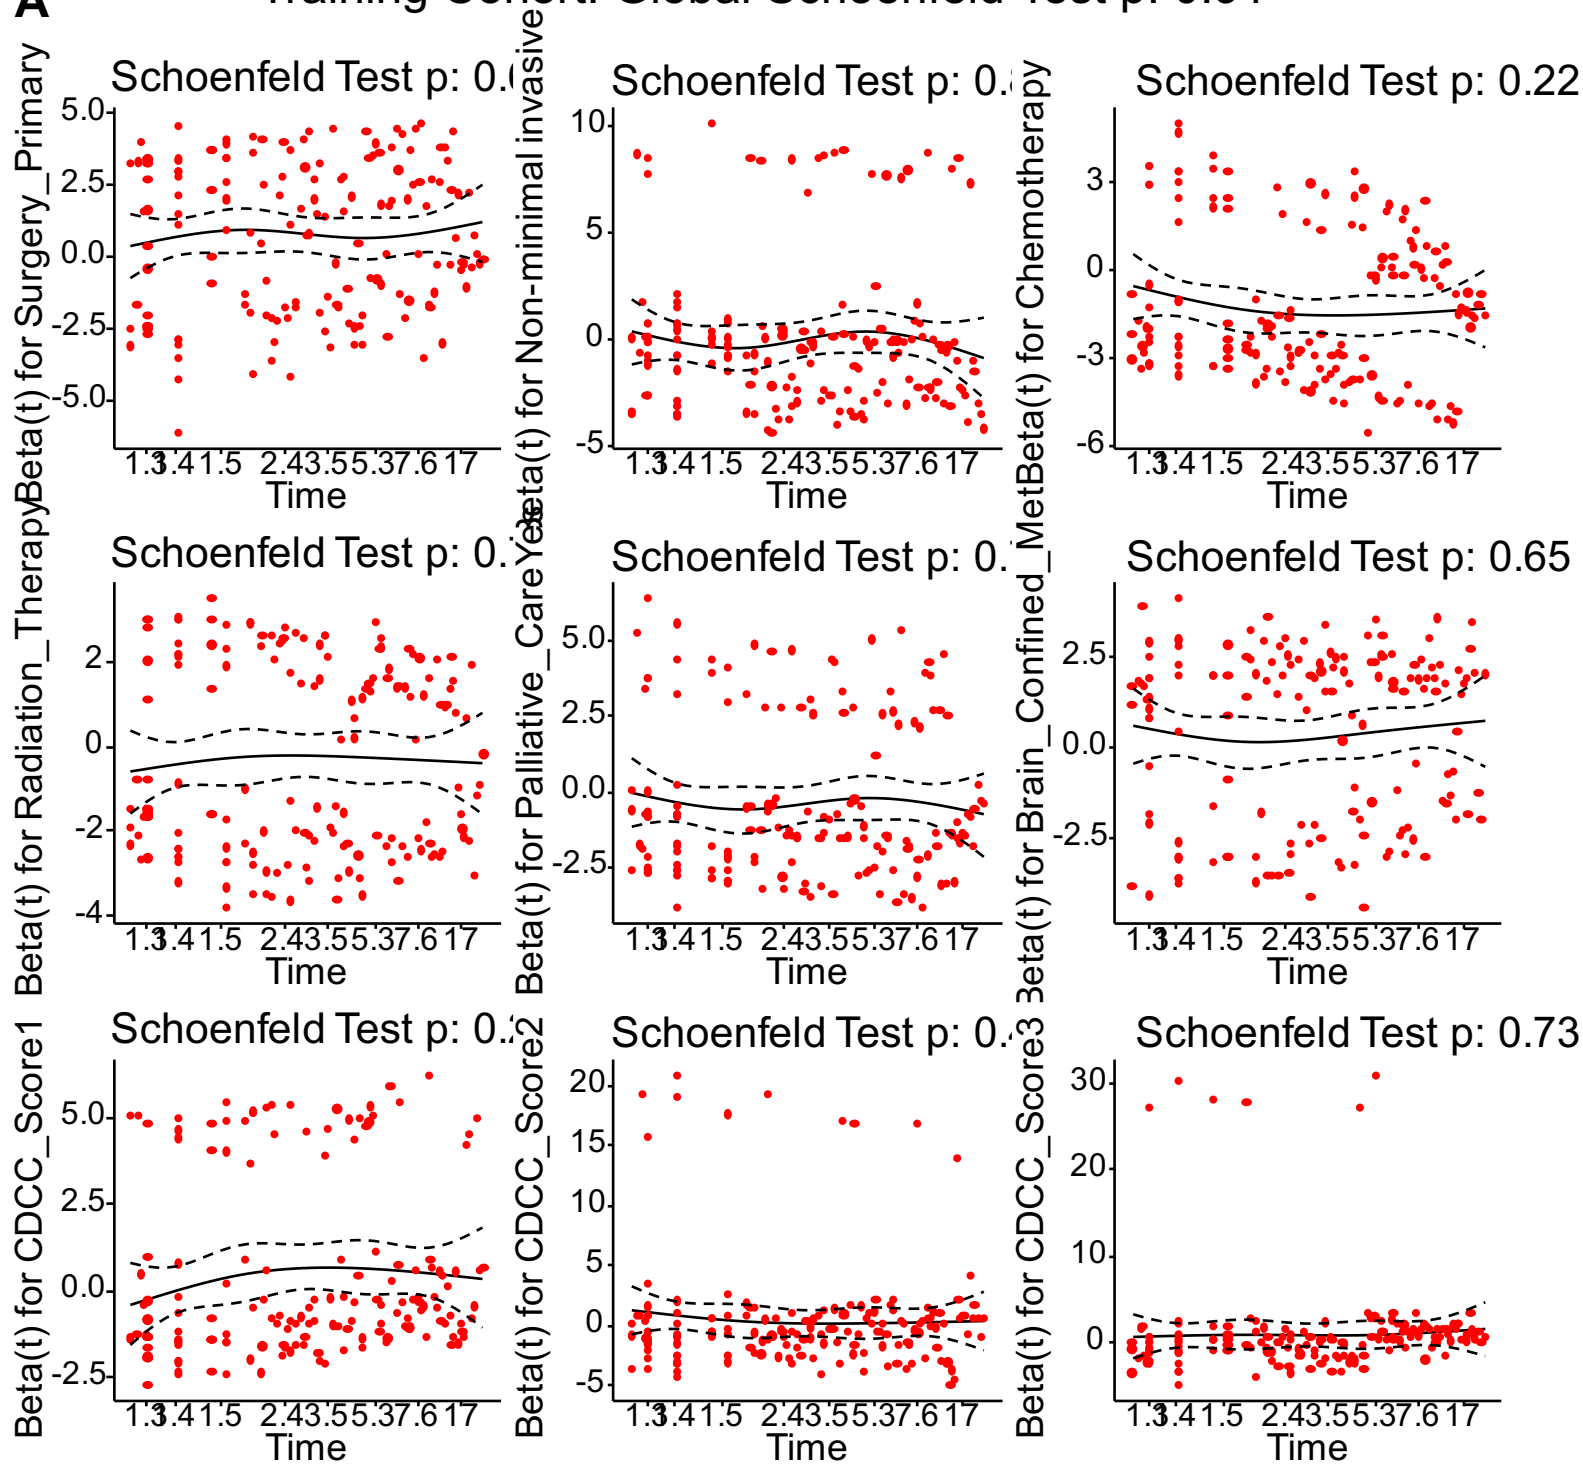

### B Testing Cohort: Global Schoenfeld Test p: 0.53

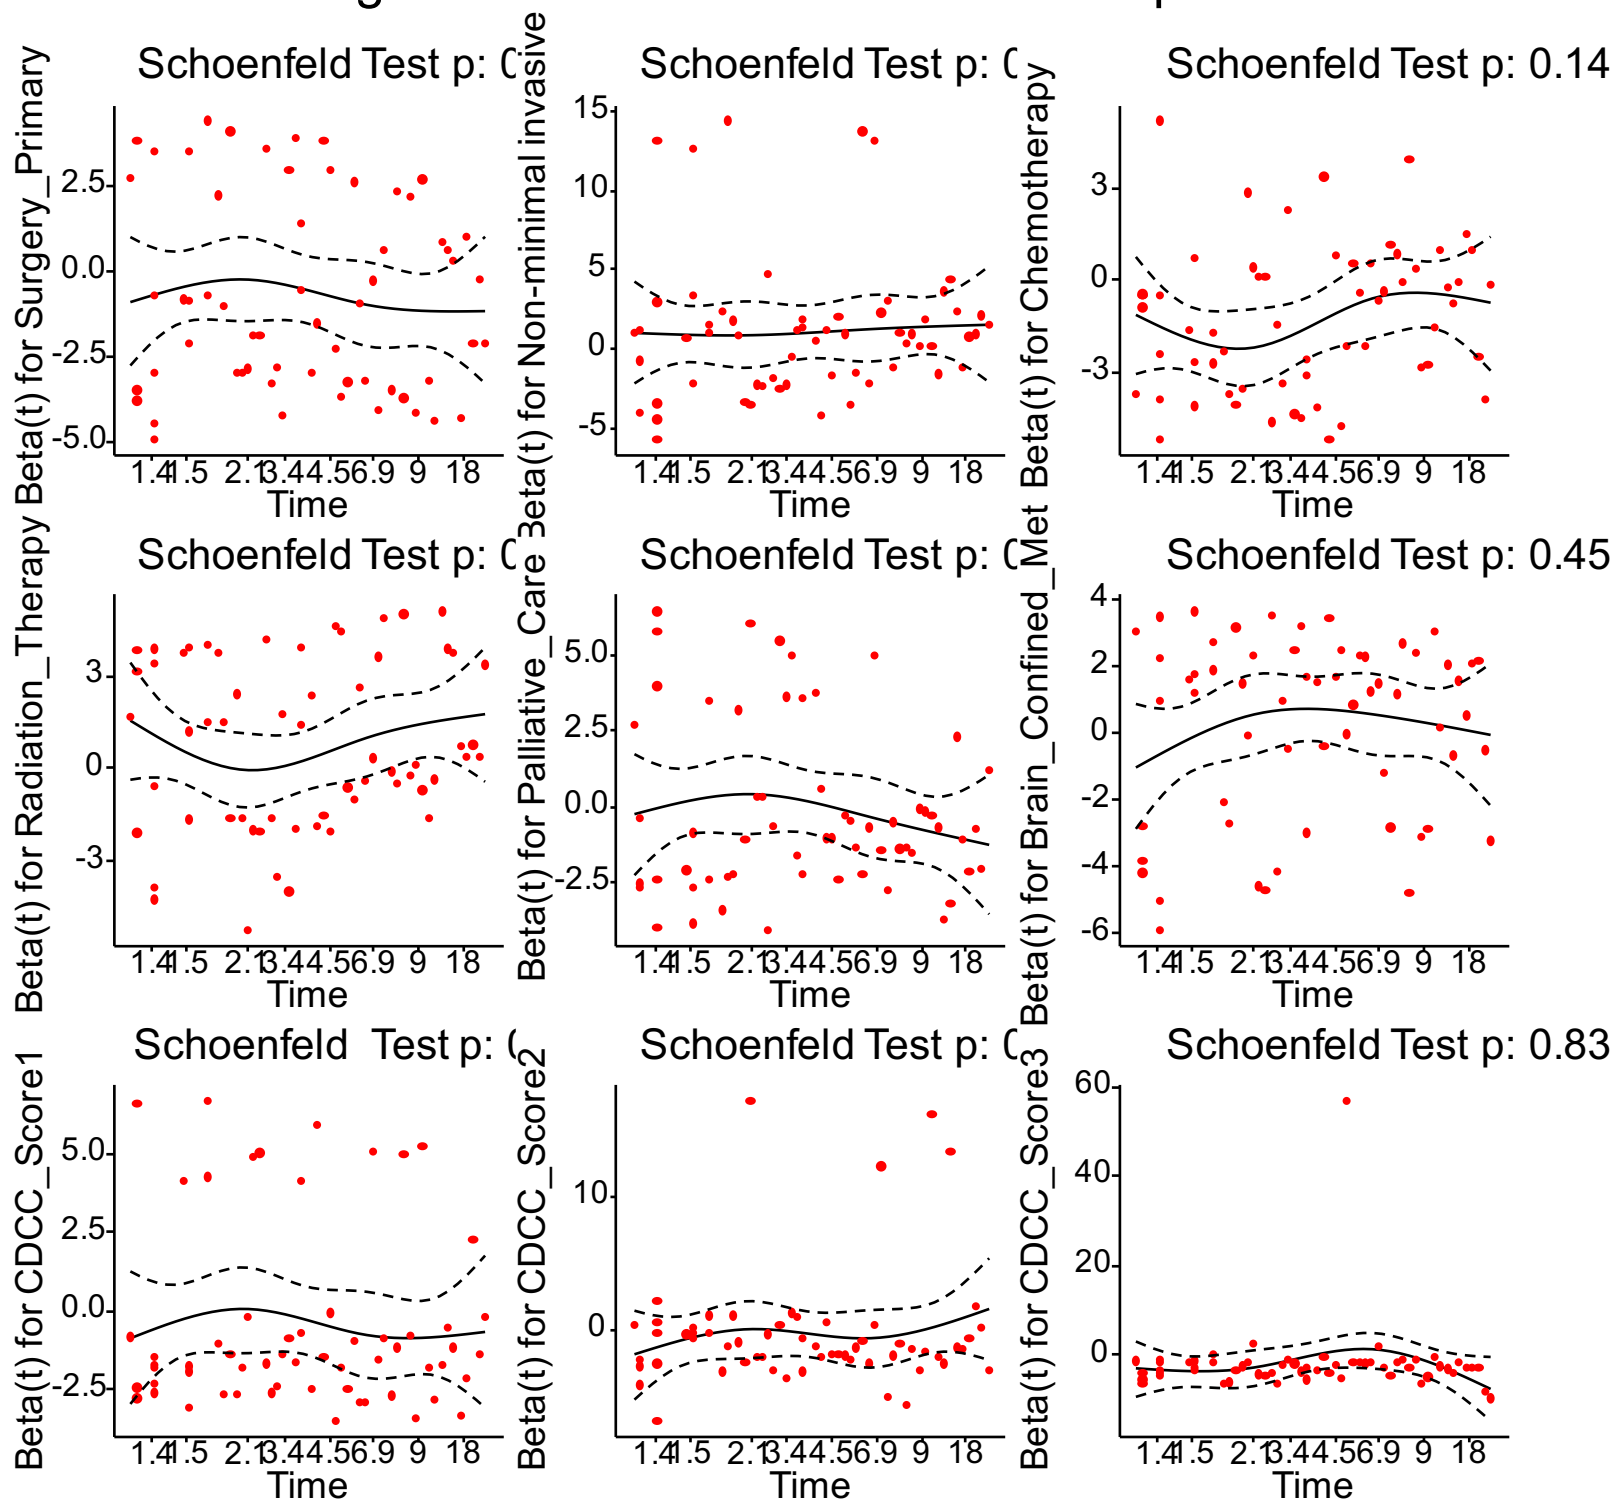

Supplement: MOESM1 [file 17486890]
